# Supplementary material for: Joint modeling strategy for using electronic medical records data to build machine learning models: an example of intracerebral hemorrhage
Source: Springer Nature journal article supplement (doi:10.1186/s12911-022-02018-x), 2022-10-25
Supplement: 12911_2022_2018_MOESM1_ESM.pdf [file 12911_2022_2018_MOESM1_ESM.pdf]

| CVCF | resampling | model    | Accuracy            | Sensitivity         | Specificity         | AUC                 | Precision           | Recall              | F1                  |
|------|------------|----------|---------------------|---------------------|---------------------|---------------------|---------------------|---------------------|---------------------|
| No   | Original   | LR       | 0.787 (0.779-0.794) | 0.424 (0.399-0.45)  | 0.948 (0.943-0.953) | 0.733 (0.717-0.748) | 0.784 (0.764-0.805) | 0.424 (0.399-0.45)  | 0.55 (0.526-0.574)  |
| No   | Original   | RF       | 0.811 (0.803-0.82)  | 0.426 (0.404-0.448) | 0.983 (0.977-0.99)  | 0.743 (0.729-0.757) | 0.92 (0.893-0.947)  | 0.426 (0.404-0.448) | 0.581 (0.559-0.603) |
| No   | Original   | ANN      | 0.809 (0.801-0.817) | 0.415 (0.391-0.439) | 0.985 (0.978-0.991) | 0.751 (0.734-0.767) | 0.925 (0.9-0.951)   | 0.415 (0.391-0.439) | 0.572 (0.549-0.594) |
| No   | Original   | SVM      | 0.807 (0.799-0.814) | 0.42 (0.395-0.445)  | 0.979 (0.972-0.986) | 0.725 (0.708-0.743) | 0.903 (0.877-0.929) | 0.42 (0.395-0.445)  | 0.571 (0.55-0.593)  |
| No   | Original   | KNN      | 0.798 (0.789-0.807) | 0.395 (0.369-0.421) | 0.977 (0.972-0.983) | 0.737 (0.722-0.753) | 0.886 (0.86-0.912)  | 0.395 (0.369-0.421) | 0.545 (0.519-0.572) |
| No   | Original   | Stacking | 0.813 (0.805-0.821) | 0.435 (0.409-0.462) | 0.981 (0.974-0.989) | 0.756 (0.741-0.77)  | 0.916 (0.886-0.946) | 0.435 (0.409-0.462) | 0.588 (0.565-0.612) |
| No   | Original   | AdaBoost | 0.816 (0.805-0.826) | 0.455 (0.428-0.482) | 0.977 (0.971-0.982) | 0.743 (0.727-0.758) | 0.897 (0.877-0.918) | 0.455 (0.428-0.482) | 0.602 (0.578-0.627) |
| No   | ROS        | LR       | 0.777 (0.764-0.79)  | 0.518 (0.491-0.544) | 0.893 (0.882-0.904) | 0.738 (0.721-0.755) | 0.684 (0.661-0.707) | 0.518 (0.491-0.544) | 0.589 (0.565-0.613) |
| No   | ROS        | RF       | 0.789 (0.775-0.802) | 0.498 (0.475-0.522) | 0.919 (0.902-0.936) | 0.75 (0.736-0.763)  | 0.736 (0.691-0.78)  | 0.498 (0.475-0.522) | 0.592 (0.568-0.617) |
| No   | ROS        | ANN      | 0.784 (0.771-0.797) | 0.504 (0.477-0.532) | 0.909 (0.896-0.923) | 0.739 (0.722-0.757) | 0.714 (0.679-0.749) | 0.504 (0.477-0.532) | 0.59 (0.565-0.615)  |
| No   | ROS        | SVM      | 0.766 (0.751-0.782) | 0.547 (0.523-0.572) | 0.864 (0.848-0.88)  | 0.728 (0.715-0.741) | 0.644 (0.619-0.669) | 0.547 (0.523-0.572) | 0.591 (0.57-0.613)  |
| No   | ROS        | KNN      | 0.785 (0.778-0.793) | 0.485 (0.459-0.511) | 0.92 (0.911-0.929)  | 0.744 (0.729-0.759) | 0.73 (0.703-0.756)  | 0.485 (0.459-0.511) | 0.581 (0.56-0.602)  |
| No   | ROS        | Stacking | 0.773 (0.762-0.785) | 0.533 (0.504-0.562) | 0.881 (0.864-0.899) | 0.745 (0.727-0.764) | 0.669 (0.636-0.703) | 0.533 (0.504-0.562) | 0.591 (0.57-0.613)  |
| No   | ROS        | AdaBoost | 0.786 (0.778-0.794) | 0.496 (0.473-0.518) | 0.915 (0.899-0.932) | 0.738 (0.722-0.754) | 0.727 (0.69-0.765)  | 0.496 (0.473-0.518) | 0.587 (0.572-0.603) |
| No   | RUS        | LR       | 0.774 (0.763-0.785) | 0.527 (0.497-0.557) | 0.884 (0.873-0.896) | 0.736 (0.72-0.753)  | 0.671 (0.653-0.69)  | 0.527 (0.497-0.557) | 0.589 (0.568-0.611) |
| No   | RUS        | RF       | 0.784 (0.771-0.798) | 0.513 (0.481-0.544) | 0.906 (0.895-0.916) | 0.75 (0.735-0.765)  | 0.708 (0.683-0.733) | 0.513 (0.481-0.544) | 0.594 (0.567-0.621) |
| No   | RUS        | ANN      | 0.778 (0.762-0.795) | 0.537 (0.505-0.569) | 0.886 (0.869-0.903) | 0.75 (0.732-0.768)  | 0.681 (0.647-0.714) | 0.537 (0.505-0.569) | 0.599 (0.572-0.626) |
| No   | RUS        | SVM      | 0.751 (0.737-0.764) | 0.572 (0.549-0.595) | 0.83 (0.812-0.849)  | 0.74 (0.726-0.753)  | 0.603 (0.577-0.629) | 0.572 (0.549-0.595) | 0.586 (0.568-0.604) |
| No   | RUS        | KNN      | 0.775 (0.764-0.786) | 0.458 (0.425-0.491) | 0.917 (0.904-0.929) | 0.733 (0.719-0.746) | 0.713 (0.681-0.744) | 0.458 (0.425-0.491) | 0.555 (0.528-0.582) |
| No   | RUS        | Stacking | 0.767 (0.751-0.783) | 0.557 (0.529-0.586) | 0.86 (0.845-0.876)  | 0.752 (0.736-0.768) | 0.642 (0.616-0.667) | 0.557 (0.529-0.586) | 0.596 (0.572-0.619) |
| No   | RUS        | AdaBoost | 0.778 (0.764-0.793) | 0.514 (0.484-0.544) | 0.897 (0.883-0.91)  | 0.74 (0.726-0.754)  | 0.69 (0.656-0.723)  | 0.514 (0.484-0.544) | 0.588 (0.56-0.616)  |
| No   | ADAYSN     | LR       | 0.761 (0.75-0.772)  | 0.516 (0.484-0.547) | 0.87 (0.856-0.884)  | 0.722 (0.704-0.74)  | 0.64 (0.625-0.656)  | 0.516 (0.484-0.547) | 0.57 (0.55-0.59)    |
| No   | ADAYSN     | RF       | 0.757 (0.741-0.772) | 0.523 (0.489-0.556) | 0.862 (0.843-0.88)  | 0.737 (0.718-0.756) | 0.629 (0.588-0.669) | 0.523 (0.489-0.556) | 0.569 (0.54-0.598)  |
| No   | ADAYSN     | ANN      | 0.74 (0.724-0.757)  | 0.531 (0.498-0.563) | 0.834 (0.812-0.856) | 0.711 (0.694-0.729) | 0.591 (0.552-0.63)  | 0.531 (0.498-0.563) | 0.557 (0.53-0.584)  |
| No   | ADAYSN     | SVM      | 0.726 (0.713-0.738) | 0.564 (0.532-0.595) | 0.798 (0.781-0.816) | 0.718 (0.698-0.738) | 0.556 (0.533-0.578) | 0.564 (0.532-0.595) | 0.558 (0.538-0.579) |
| No   | ADAYSN     | KNN      | 0.748 (0.736-0.76)  | 0.514 (0.485-0.543) | 0.853 (0.837-0.869) | 0.706 (0.691-0.722) | 0.61 (0.578-0.642)  | 0.514 (0.485-0.543) | 0.556 (0.534-0.579) |
| No   | ADAYSN     | Stacking | 0.749 (0.732-0.766) | 0.548 (0.52-0.576)  | 0.839 (0.82-0.858)  | 0.718 (0.7-0.736)   | 0.605 (0.572-0.638) | 0.548 (0.52-0.576)  | 0.574 (0.548-0.6)   |
| No   | ADAYSN     | AdaBoost | 0.751 (0.74-0.762)  | 0.523 (0.491-0.556) | 0.853 (0.839-0.868) | 0.706 (0.688-0.723) | 0.615 (0.585-0.645) | 0.523 (0.491-0.556) | 0.564 (0.539-0.589) |
| No   | BSMOTE     | LR       | 0.729 (0.711-0.747) | 0.584 (0.556-0.613) | 0.794 (0.765-0.823) | 0.732 (0.716-0.749) | 0.562 (0.526-0.599) | 0.584 (0.556-0.613) | 0.571 (0.549-0.593) |
| No   | BSMOTE     | RF       | 0.72 (0.7-0.741)    | 0.57 (0.547-0.593)  | 0.788 (0.759-0.817) | 0.737 (0.721-0.753) | 0.549 (0.508-0.591) | 0.57 (0.547-0.593)  | 0.558 (0.531-0.585) |
| No   | BSMOTE     | ANN      | 0.72 (0.703-0.738)  | 0.564 (0.544-0.584) | 0.791 (0.767-0.814) | 0.724 (0.701-0.747) | 0.548 (0.512-0.585) | 0.564 (0.544-0.584) | 0.555 (0.531-0.579) |
| No   | BSMOTE     | SVM      | 0.701 (0.678-0.725) | 0.584 (0.555-0.612) | 0.755 (0.717-0.792) | 0.72 (0.699-0.741)  | 0.52 (0.48-0.561)   | 0.584 (0.555-0.612) | 0.547 (0.521-0.574) |
| No   | BSMOTE     | KNN      | 0.707 (0.682-0.731) | 0.563 (0.543-0.583) | 0.771 (0.737-0.806) | 0.718 (0.698-0.738) | 0.529 (0.486-0.571) | 0.563 (0.543-0.583) | 0.543 (0.515-0.571) |
| No   | BSMOTE     | Stacking | 0.71 (0.692-0.727)  | 0.602 (0.575-0.628) | 0.758 (0.728-0.787) | 0.733 (0.712-0.755) | 0.529 (0.499-0.56)  | 0.602 (0.575-0.628) | 0.561 (0.543-0.579) |
| No   | BSMOTE     | AdaBoost | 0.713 (0.689-0.737) | 0.572 (0.548-0.596) | 0.776 (0.742-0.811) | 0.721 (0.699-0.744) | 0.538 (0.496-0.581) | 0.572 (0.548-0.596) | 0.552 (0.524-0.581) |
| No   | SMOTEENN   | LR       | 0.68 (0.646-0.714)  | 0.603 (0.568-0.637) | 0.715 (0.658-0.772) | 0.718 (0.698-0.739) | 0.497 (0.446-0.549) | 0.603 (0.568-0.637) | 0.539 (0.512-0.567) |
| No   | SMOTEENN   | RF       | 0.651 (0.625-0.677) | 0.646 (0.61-0.682)  | 0.654 (0.606-0.702) | 0.696 (0.671-0.721) | 0.459 (0.427-0.492) | 0.646 (0.61-0.682)  | 0.534 (0.514-0.554) |
| No   | SMOTEENN   | ANN      | 0.652 (0.624-0.679) | 0.642 (0.607-0.678) | 0.656 (0.614-0.699) | 0.706 (0.685-0.727) | 0.459 (0.426-0.491) | 0.642 (0.607-0.678) | 0.533 (0.508-0.558) |
| No   | SMOTEENN   | SVM      | 0.661 (0.626-0.695) | 0.645 (0.615-0.675) | 0.669 (0.61-0.727)  | 0.707 (0.686-0.727) | 0.474 (0.431-0.517) | 0.645 (0.615-0.675) | 0.542 (0.518-0.565) |
| No   | SMOTEENN   | KNN      | 0.683 (0.652-0.715) | 0.57 (0.527-0.612)  | 0.735 (0.676-0.794) | 0.686 (0.663-0.709) | 0.501 (0.457-0.544) | 0.57 (0.527-0.612)  | 0.526 (0.504-0.549) |
| No   | SMOTEENN   | Stacking | 0.638 (0.603-0.673) | 0.662 (0.624-0.699) | 0.628 (0.569-0.687) | 0.672 (0.647-0.696) | 0.449 (0.412-0.487) | 0.662 (0.624-0.699) | 0.531 (0.507-0.556) |
| No   | SMOTEENN   | AdaBoost | 0.645 (0.605-0.686) | 0.654 (0.617-0.692) | 0.642 (0.571-0.712) | 0.703 (0.68-0.727)  | 0.46 (0.415-0.506)  | 0.654 (0.617-0.692) | 0.535 (0.509-0.56)  |
| Yes  | Original   | LR       | 0.797 (0.788-0.805) | 0.393 (0.369-0.417) | 0.977 (0.969-0.985) | 0.722 (0.707-0.738) | 0.885 (0.851-0.919) | 0.393 (0.369-0.417) | 0.543 (0.518-0.567) |
| Yes  | Original   | RF       | 0.812 (0.803-0.821) | 0.424 (0.395-0.452) | 0.986 (0.98-0.992)  | 0.737 (0.722-0.751) | 0.933 (0.909-0.957) | 0.424 (0.395-0.452) | 0.581 (0.555-0.607) |
| Yes  | Original   | ANN      | 0.816 (0.806-0.825) | 0.436 (0.409-0.462) | 0.985 (0.979-0.992) | 0.745 (0.727-0.763) | 0.931 (0.905-0.957) | 0.436 (0.409-0.462) | 0.592 (0.566-0.617) |
| Yes  | Original   | SVM      | 0.816 (0.807-0.826) | 0.436 (0.407-0.466) | 0.986 (0.978-0.994) | 0.746 (0.735-0.758) | 0.938 (0.907-0.969) | 0.436 (0.407-0.466) | 0.593 (0.567-0.62)  |
| Yes  | Original   | KNN      | 0.796 (0.786-0.805) | 0.368 (0.341-0.395) | 0.987 (0.982-0.992) | 0.724 (0.713-0.735) | 0.924 (0.896-0.951) | 0.368 (0.341-0.395) | 0.525 (0.495-0.555) |
| Yes  | Original   | Stacking | 0.816 (0.806-0.826) | 0.436 (0.409-0.464) | 0.986 (0.979-0.992) | 0.725 (0.703-0.747) | 0.933 (0.905-0.96)  | 0.436 (0.409-0.464) | 0.593 (0.567-0.619) |
| Yes  | Original   | AdaBoost | 0.814 (0.805-0.823) | 0.431 (0.404-0.458) | 0.985 (0.979-0.99)  | 0.747 (0.734-0.761) | 0.927 (0.904-0.951) | 0.431 (0.404-0.458) | 0.587 (0.562-0.611) |
| Yes  | ROS        | LR       | 0.794 (0.785-0.802) | 0.468 (0.439-0.497) | 0.939 (0.932-0.946) | 0.738 (0.723-0.753) | 0.775 (0.755-0.795) | 0.468 (0.439-0.497) | 0.582 (0.558-0.606) |
| Yes  | ROS        | RF       | 0.814 (0.805-0.822) | 0.433 (0.406-0.459) | 0.984 (0.978-0.99)  | 0.748 (0.733-0.763) | 0.925 (0.901-0.95)  | 0.433 (0.406-0.459) | 0.588 (0.564-0.611) |
| Yes  | ROS        | ANN      | 0.815 (0.806-0.825) | 0.437 (0.411-0.464) | 0.984 (0.976-0.992) | 0.742 (0.724-0.759) | 0.928 (0.896-0.96)  | 0.437 (0.411-0.464) | 0.593 (0.568-0.619) |
| Yes  | ROS        | SVM      | 0.815 (0.806-0.825) | 0.437 (0.409-0.465) | 0.984 (0.977-0.991) | 0.746 (0.736-0.756) | 0.928 (0.9-0.956)   | 0.437 (0.409-0.465) | 0.592 (0.567-0.618) |
| Yes  | ROS        | KNN      | 0.805 (0.797-0.814) | 0.453 (0.429-0.476) | 0.963 (0.958-0.968) | 0.725 (0.714-0.735) | 0.845 (0.83-0.86)   | 0.453 (0.429-0.476) | 0.589 (0.568-0.609) |
| Yes  | ROS        | Stacking | 0.816 (0.806-0.825) | 0.435 (0.408-0.461) | 0.986 (0.979-0.992) | 0.724 (0.701-0.747) | 0.933 (0.906-0.96)  | 0.435 (0.408-0.461) | 0.592 (0.567-0.616) |
| Yes  | ROS        | AdaBoost | 0.814 (0.804-0.823) | 0.433 (0.405-0.461) | 0.984 (0.978-0.989) | 0.734 (0.722-0.747) | 0.923 (0.9-0.946)   | 0.433 (0.405-0.461) | 0.588 (0.562-0.614) |
| Yes  | RUS        | LR       | 0.795 (0.787-0.802) | 0.471 (0.445-0.498) | 0.939 (0.931-0.947) | 0.735 (0.719-0.75)  | 0.777 (0.755-0.799) | 0.471 (0.445-0.498) | 0.585 (0.565-0.605) |
| Yes  | RUS        | RF       | 0.809 (0.801-0.818) | 0.44 (0.413-0.467)  | 0.974 (0.965-0.984) | 0.752 (0.738-0.765) | 0.889 (0.857-0.92)  | 0.44 (0.413-0.467)  | 0.587 (0.564-0.609) |
| Yes  | RUS        | ANN      | 0.814 (0.804-0.824) | 0.44 (0.413-0.467)  | 0.981 (0.972-0.991) | 0.749 (0.735-0.764) | 0.918 (0.882-0.955) | 0.44 (0.413-0.467)  | 0.593 (0.568-0.618) |
| Yes  | RUS        | SVM      | 0.811 (0.802-0.819) | 0.451 (0.421-0.48)  | 0.972 (0.959-0.984) | 0.748 (0.736-0.76)  | 0.883 (0.842-0.924) | 0.451 (0.421-0.48)  | 0.594 (0.572-0.616) |
| Yes  | RUS        | KNN      | 0.786 (0.776-0.797) | 0.445 (0.419-0.471) | 0.938 (0.929-0.947) | 0.734 (0.719-0.75)  | 0.764 (0.738-0.79)  | 0.445 (0.419-0.471) | 0.561 (0.536-0.587) |
| Yes  | RUS        | Stacking | 0.813 (0.804-0.822) | 0.44 (0.412-0.467)  | 0.98 (0.971-0.989)  | 0.742 (0.724-0.759) | 0.911 (0.878-0.944) | 0.44 (0.412-0.467)  | 0.591 (0.567-0.614) |
| Yes  | RUS        | AdaBoost | 0.81 (0.8-0.82)     | 0.443 (0.415-0.47)  | 0.974 (0.965-0.983) | 0.746 (0.728-0.763) | 0.888 (0.858-0.918) | 0.443 (0.415-0.47)  | 0.589 (0.564-0.613) |
| Yes  | ADAYSN     | LR       | 0.776 (0.765-0.787) | 0.424 (0.394-0.454) | 0.934 (0.926-0.941) | 0.736 (0.719-0.753) | 0.741 (0.72-0.761)  | 0.424 (0.394-0.454) | 0.538 (0.512-0.564) |
| Yes  | ADAYSN     | RF       | 0.813 (0.804-0.823) | 0.437 (0.41-0.465)  | 0.981 (0.974-0.989) | 0.738 (0.724-0.753) | 0.917 (0.888-0.945) | 0.437 (0.41-0.465)  | 0.59 (0.566-0.614)  |
| Yes  | ADAYSN     | ANN      | 0.814 (0.803-0.824) | 0.437 (0.408-0.465) | 0.982 (0.974-0.99)  | 0.752 (0.735-0.768) | 0.919 (0.888-0.95)  | 0.437 (0.408-0.465) | 0.59 (0.564-0.616)  |
| Yes  | ADAYSN     | SVM      | 0.813 (0.804-0.823) | 0.437 (0.409-0.465) | 0.981 (0.973-0.99)  | 0.746 (0.734-0.759) | 0.917 (0.885-0.95)  | 0.437 (0.409-0.465) | 0.59 (0.565-0.615)  |
| Yes  | ADAYSN     | KNN      | 0.806 (0.795-0.816) | 0.446 (0.422-0.47)  | 0.966 (0.958-0.975) | 0.724 (0.713-0.734) | 0.856 (0.826-0.887) | 0.446 (0.422-0.47)  | 0.585 (0.561-0.609) |
| Yes  | ADAYSN     | Stacking | 0.814 (0.804-0.824) | 0.436 (0.408-0.463) | 0.983 (0.975-0.991) | 0.714 (0.695-0.733) | 0.923 (0.89-0.955)  | 0.436 (0.408-0.463) | 0.59 (0.565-0.615)  |
| Yes  | ADAYSN     | AdaBoost | 0.813 (0.804-0.822) | 0.436 (0.409-0.463) | 0.981 (0.974-0.989) | 0.732 (0.719-0.745) | 0.915 (0.887-0.943) | 0.436 (0.409        |                     |
